# Supplementary material for: Computation is concentrated in rich clubs of local cortical networks
Source: PubMed Central journal article supplement (PMC6370472; doi:10.1162/netn_a_00069), 2019-02-01
Supplement: netn-03-384-s001.pdf [file netn-03-384-s001.pdf]

## 1 SUPPLEMENTAL METHODS

2  
3 The methods used in this study include many steps. These will be described below in the following  
4 order: (1) *in vitro* data collection; (2) construction of effective connectivity networks; (3)  
5 quantification of neural computation; (4) rich club detection in networks of effective connectivity;  
6 (5) quantification of the relationship between synergy and rich clubs; (6) control analyses of the  
7 synergy-rich club relationship; (7) alternative approaches for quantifying neural computation; and  
8 (8) consideration of neuron auto-prediction.

### 9 10 ***In vitro* data**

11  
12 To study the relationship between neural computation and topological measures of networks of  
13 spiking neurons, we analyzed data collected *in vitro*. Data were spontaneously spiking organotypic  
14 cultures of mouse somatosensory cortex obtained from postnatal Day 6 to 7 Black 6 mouse pups  
15 (RRID:Charles\_River:24101632, Harlan) according to Tang et al., 2008 (Ito et al., 2014). All  
16 animal tissue samples were prepared according to guidelines from the National Institutes of Health  
17 and all animal use procedures were approved by the Indiana University Animal Care and Use  
18 Committee as well as the Animal Care and Use Committee at the University of California, Santa  
19 Cruz. Spontaneous (as opposed to stimulus-driven) spiking activity in the cultures was recorded at  
20 a high temporal resolution of 50  $\mu$ s, between 2 and 4 weeks after culture preparation, using a 512-  
21 microelectrode array (Litke et al., 2004). Array electrodes were flat, 5  $\mu$ m in diameter and arranged  
22 in a triangular lattice with an interelectrode distance of 60  $\mu$ m. This spacing means that the spiking  
23 of most cells is picked up by multiple sites and there are few gaps where cells are too far from  
24 electrodes to be recorded. The full array allowed for a total recording area of approximately 0.9  
25 mm by 1.9 mm. This preparation and recording method enabled the isolation of large numbers of  
26 neurons (an average of 309 cells per recording in 25 hour-long recordings) at high temporal  
27 resolution, beyond what can currently be done in any *in vivo* setup. Crucially, the temporal  
28 resolution of this method was small enough to resolve synaptic delays of 1-20 ms typically found  
29 in cortex (Mason et al., 1991; Swadlow, 1994).

30  
31 Once the data were collected, spikes were sorted using a PCA approach based on waveforms  
32 detected at seven adjacent electrodes (Ito et al., 2014; Litke et al., 2004; Timme et al., 2014). This  
33 process yielded a single set of spike times for each isolated neuron. Neurons that spiked fewer than  
34 100 spikes during the hour long recording were removed from the analysis. Spike trains were then  
35 used to build networks.

### 36 37 **Effective connectivity network construction**

38  
39 Because neural computation is fundamentally a dynamic process, we focused on examining  
40 networks of effective connectivity. In these networks, connections represent a predictive  
41 relationship between the firing of two different neurons. Note, effective connectivity differs from  
42 structural connectivity (synapses or gap junctions between neurons) and functional connectivity  
43 (e.g., cross-correlations between neuronal time series). Here, effective connections represent  
44 directed information transfer between neurons.

45

46 Networks of effective connectivity, representing global activity in recordings, were constructed  
 47 according to Timme et al (2014, 2016) using a measure from information theory known as transfer  
 48 entropy (TE; Schreiber, 2000). TE was selected for its ability to detect nonlinear interactions and  
 49 deal with discrete data, such as spike trains. To capture neuron interactions at timescales relevant  
 50 to synaptic transmission (14 ms; Mason et al., 1991; Swadlow, 1994), multiple windows are used  
 51 to improve the sensitivity to functional interactions across these delays. spiking data was binned  
 52 at three logarithmically-spaced bin sizes (1, 1.6 and 3.5 ms) and TE was computed at delays (0-3  
 53 bins, for bins of size 1 and 1-4 bins for bins of size 1.6 and 3.5 ms) corresponding to synaptic  
 54 delays, as in Timme et al. (2014, 2016). Thus, we computed TE at three timescales, 0.05–3 ms,  
 55 1.6–6.4 ms and 3.5–14 ms. Timescales were purposefully designed to be overlapping so that no  
 56 interactions were neglected. See Figure 1 for an overview of the binning structure used in TE  
 57 calculations.

58  
 59 TE quantifies an effective connection from neuron J to neuron I by measuring how much  
 60 information the past state of the neuron J time series ( $J_{t-1}$ ) produces regarding the current state of  
 61 the neuron I time series ( $I_t$ ), beyond what is provided by the past state of the neuron I time series  
 62 ( $I_{t-1}$ ). Here, time series are binary spike trains for neurons I and J, containing 0 for time bins in  
 63 which the neuron did not spike and 1 for time bins in which it did spike. Generally, the TE from  
 64 neuron J to neuron I is computed as:

$$TE_{J \rightarrow I} = \sum_{i_t, i_{t-1}, j_{t-1}} p(i_t, i_{t-1}, j_{t-1}) \log \left( \frac{p(i_t | i_{t-1}, j_{t-1})}{p(i_t | i_{t-1})} \right) \quad (1)$$

66 The probabilities in Eqn. 1 are computed by counting the number of occurrences of all possible  
 67 combinations of spiking and not spiking in the  $i_t, i_{t-1}$  and  $j_{t-1}$  time bins (of the  $I_t, I_{t-1}$  and  $J_{t-1}$   
 68 time series) for all bins making up the hour-long recording.

69  
 70 Because we wanted to consider interactions at three timescales associated with synaptic  
 71 transmission, we included a delay between the past and future states of the neurons so that  $i_{t-1}$   
 72 became  $i_{t-d}$  and  $j_{t-1}$  became  $j_{t-d}$ . Additionally, in order to ensure overlapping timescales, we  
 73 combined the  $i_{t-d}$  and  $j_{t-d}$  bins with their previous time bins, such that a spike in either or both  
 74 time bins corresponded to a state of 1 while no spikes in either time bin corresponded to a state of  
 75 0 (See Figure 1 for binning structure). Denoting these new bins as  $i'_{t-d}$  and  $j'_{t-d}$  gives a slightly  
 76 different form for TE:

$$TE(d)_{J \rightarrow I} = \sum_{i_t, i'_{t-d}, j'_{t-d}} p(i_t, i'_{t-d}, j'_{t-d}) \log \left( \frac{p(i_t | i'_{t-d}, j'_{t-d})}{p(i_t | i'_{t-d})} \right) \quad (2)$$

78

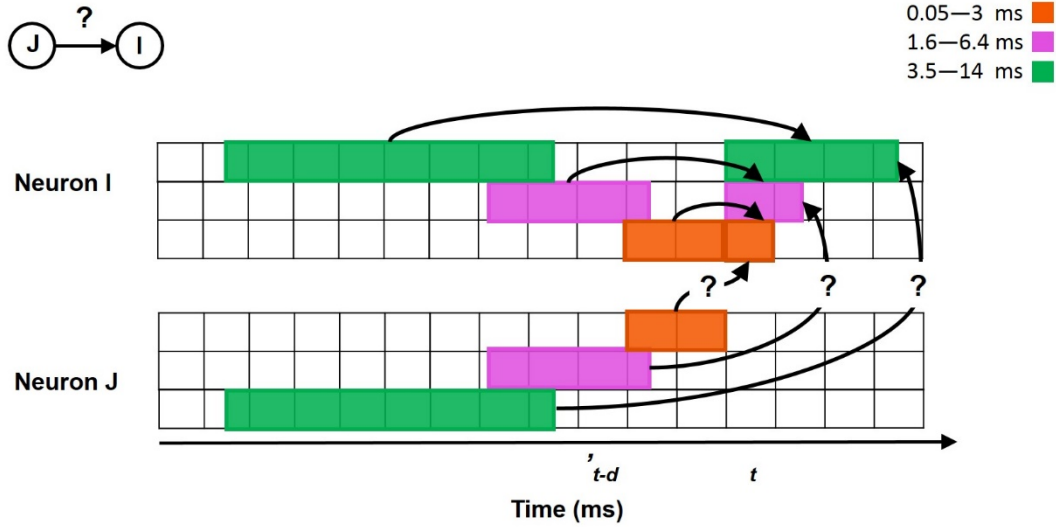

79  
80 **Figure 1.** Overview of time series binning structure used in transfer entropy calculations. Transfer entropy was used to quantify a  
81 directed, functional connection from neuron J to neuron I which represents how well the current state ( $t$ ) of neuron I can be predicted  
82 by the past state ( $t-d$ ) of neuron J, beyond what is known from the past state of neuron I itself. Three timescales were considered,  
83 each with corresponding delays ( $d$ ). Timescales considered transfer entropy from 0.05–3 ms, 1.6–6.4 ms, and 3.5–14 ms.  
84

85 To cast TE in terms of the percentage of the receiver neuron's capacity that can be accounted for  
86 by the transmitting neuron, rather than it representing the amount of information being transmitted  
87 from transmitter to receiver, we normalized TE by the entropy of the receiver neuron via:

$$TE_{Norm}(d)_{J \rightarrow I} = \frac{TE(d)_{J \rightarrow I}}{-\sum_{i_t} p(i_t) \log(p(i_t))} \quad (3)$$

88 Computing (normalized) TE in this way between all pairs of binned neuronal time series results in  
89 a time-scale dependent, weighted, directed network. Networks are weighted because some pairs  
90 of neurons fire more frequently and reliably at certain delays than others, and they are directed  
91 because a predictive, statistical relationship that exists from neuron J to neuron I, may not exist  
92 from neuron I to neuron J. Each element  $a_{ij}$  in the TE matrix is the TE value from the  $i^{th}$  to the  
93  $j^{th}$  neuron. TE values of zero denote the absence of an effective connection between the two  
94 neurons, while TE values greater than zero represent the weighted strength of the effective  
95 connection between the two neurons.  
96

97 To determine the significance of network connections (TE values), TE values were computed for  
98 5000 pairs of jittered spike trains. TE values which were larger than 99.9% of jittered values were  
99 considered significant, corresponding to a p-value of less than 0.001. Computing significant,  
100 normalized TE values for 25 recordings at three timescales, resulted in 75 full networks.  
101

102 To ensure that the detection of rich clubs was not biased by the spatial sampling of the recording  
103 apparatus, we compared the distances between rich club neurons (defined as the top 30% of  
104 neurons in a network) to the distances between all neurons in the network. We found that there  
105 were no significant differences between the two distributions of distances (KS tests revealed that  
106 75 out of 75 networks had distributions that were not significantly different at the  $\alpha = 0.01$  level;  
107 Figure 2).

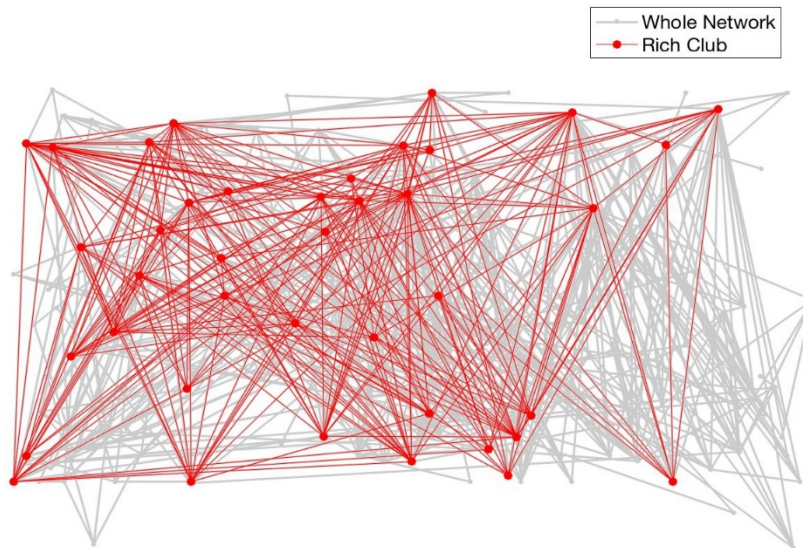

108  
109 **Figure 2.** *Spatial distribution of rich club neurons is not significantly different from the spatial distribution of the full network.*  
110 Spatial distribution of rich club neurons relative to all neurons in a representative network.

111  
112  
113 To be confident that our timescales captured the peak of information processing in our networks,  
114 we calculated TE at delays other those analyzed here for two representative networks. First, spike  
115 trains were binned at 1 ms. Then TE was calculated at multiple delays ranging from 0 to 501 ms,  
116 in steps of 3 ms, for all existing pairs of significant connections in the network. We found that TE  
117 tended to peak in the 1-14 ms delay range for most connections (Figure 3). In fact, for 87.3% of  
118 pairs on average, the peak of TE occurred at between 1 and 14 ms.

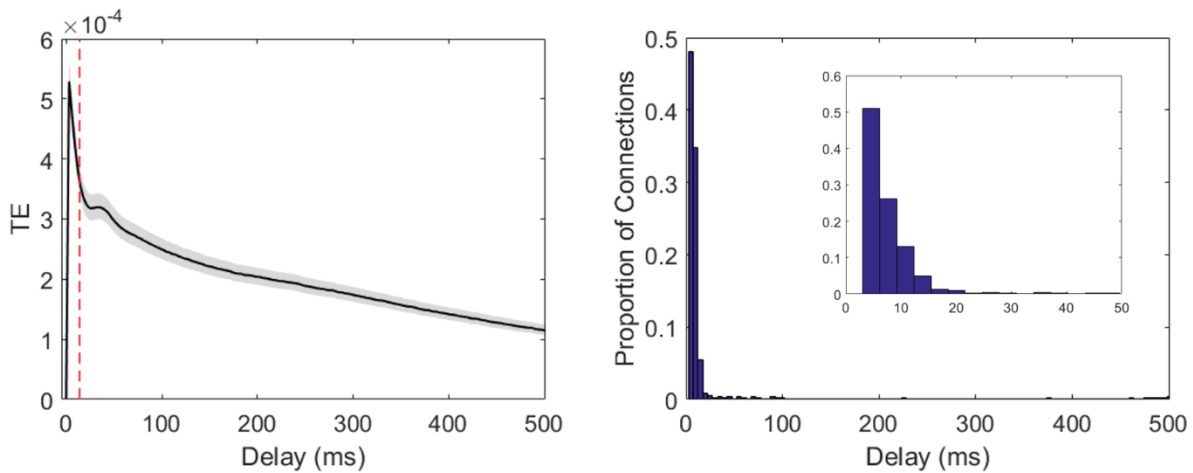

120  
121  
122 **Figure 3.** *TE peaks between 1-14 ms.* Mean distribution of TE over time for all connections from two representative networks.  
123 Left: The black line shows the mean TE over all connections from two representative networks. The shaded region shows the 95%  
124 confidence interval. The vertical dashed red line indicates the upper bound of the timescales analyzed in the manuscript. Across  
125 connections, the peak TE occurs below this bound at short latencies. Right: Histogram of the delay to the maximum TE over  
126 connections. The height of each bar shows the proportion of connections for which the peak TE was found to occur at the delay  
127 indicated along the x-axis. Most connections had max TE at short delays as shown in the inset panel which zooms in to the first 50  
128 ms of the x-axis. These plots show that most connections had a peak TE at less than 14 ms.

129

130 **Quantification of neural computation**

131

132 Computation by neurons receiving inputs from two other neurons in these networks was quantified  
133 following the partial information decomposition (PID) from Williams and Beer (2010). This  
134 method was used as it is currently the only method capable of quantifying how much computation  
135 occurs in an interaction in which three variables predict a fourth as done here (the future state of  
136 the receiver is predicted from the past state of the receiver and two other transmitters). The PID  
137 allows multivariate TE to be separated into distinct information components, one of which is a  
138 measure of neural computation termed synergy. The general form of the decomposition of  
139 multivariate TE between three neuronal time series, with two transmitter neurons, J and K, each  
140 sending a single input to one receiver neuron, I, can be expressed as (Figure 4):

$$TE(\{J, K\} \rightarrow I) = \text{Synergy}(\{J, K\} \rightarrow I) + \text{Unique}(K; J \rightarrow I) + \text{Unique}(J; K \rightarrow I) + \text{Redundancy}(\{J, K\} \rightarrow I) \quad (4)$$

141 where  $\{J, K\}$  is a vector of the combined J and K time series. Similarly, we can express the  
142 decomposition of bivariate TE from neuron J to I and neuron K to I as (Figure 4):

143

$$TE(J \rightarrow I) = \text{Unique}(K; J \rightarrow I) + \text{Redundancy}(\{J, K\} \rightarrow I) \quad (5)$$

and

$$TE(K \rightarrow I) = \text{Unique}(J; K \rightarrow I) + \text{Redundancy}(\{J, K\} \rightarrow I) \quad (6)$$

144

145 In Equations 4-6, all terms are quantified in units of bits (see Williams and Beer 2010, 2011 for a  
146 full description of these terms). The unique terms correspond to the information provided by that  
147 time series alone (either the J or the K time series) about the current state of I. The redundant term  
148 represents the overlapping information provided by time series J and K about the current state of  
149 I. Notice, in Equations 5 and 6, that although TE is only dependent on the two time series that are  
150 directly interacting (either J and I, or K and I), because J and K are both interacting with the same  
151 time series, their unique interactions are influenced by each other. Thus, the unique information  
152 provided by one of these time series is dependent on the other. In other words, because J and K  
153 provide some redundant (overlapping) information about I, J influences how much information K  
154 provides uniquely versus redundantly about I. Likewise, K influences how much information J  
155 provides uniquely versus redundantly about I.

156

157 The synergistic term in Equation 4 is the additional information (beyond the unique and redundant  
158 information) that is processed by the receiver (I) based on the non-overlapping information from  
159 both inputs (J and K) occurring simultaneously. Thus, synergy is a proxy for the non-linear  
160 computation which takes information from two sources and combines them in some way to  
161 generate a unique output.

162

163 To calculate synergy, note that Equation 4 can be rewritten as:

$$\text{Synergy}(\{J, K\} \rightarrow I) = TE(\{J, K\} \rightarrow I) - TE(J \rightarrow I) - TE(K \rightarrow I) + \text{Redundancy}(\{J, K\} \rightarrow I) \quad (7)$$

164 by substituting Equations 5 and 6 and solving for synergy. Notice that we can compute all TE  
 165 terms in Equation 7 via Equation 1. This leaves only the Redundancy term to be computed.  
 166 Fortunately, a method for measuring this term has been provided by Williams and Beer (2010,  
 167 2011), who define redundancy in terms of a quantity titled the minimum information  $I_{\min}$ :  
 168

$$\begin{aligned} \text{Redundancy}(\{J, K\} \rightarrow I) &\stackrel{\text{def}}{=} I_{\min}(I_t; J_{t-1}K_{t-1} | I_{t-1}) = \\ &\sum_{i_t} p(i_t) \min_{R \in \{J_{t-1}, K_{t-1}\}} I_{\text{spec}}(I_t = i_t; R | I_{t-1}) = \\ &\sum_{i_t} p(i_t) \min_{R \in \{J_{t-1}, K_{t-1}\}} [I_{\text{spec}}(I_t = i_t; R, I_{t-1}) - I_{\text{spec}}(I_t = i_t; I_{t-1})] \end{aligned} \quad (8)$$

169 where the specific information  $I_{\text{spec}}$  is defined as:  
 170

$$I_{\text{spec}}(I_t = i_t; R, I_{t-1}) = \sum_{r, i_{t-1}} p(r, i_{t-1} | i_t) \log \left( \frac{p(r, i_{t-1}, i_t)}{p(r, i_{t-1})p(i_t)} \right) \quad (9)$$

171 and

$$I_{\text{spec}}(I_t = i_t; I_{t-1}) = \sum_{i_{t-1}} p(i_{t-1} | i_t) \log \left( \frac{p(i_{t-1}, i_t)}{p(i_{t-1})p(i_t)} \right) \quad (10)$$

172 Thus, redundancy is the minimum information provided by J or K about each state of I, averaged  
 173 over all possible states. In other words, redundancy is the minimum overlapping information (the  
 174 shared information) that the past states of J and K provide about the current states of I. Redundancy  
 175 was calculated via Equations 9 and 10. Finally, synergy was calculated via Equation 7. Computing  
 176 synergy for all possible triads (for each neuron that received at least two inputs, all possible  
 177 groupings of two input neurons and the receiver were considered) in all networks yields a single  
 178 synergy value per triad. We then normalized synergy values by dividing by the entropy of the  
 179 future state of I, as done in Equation 3.

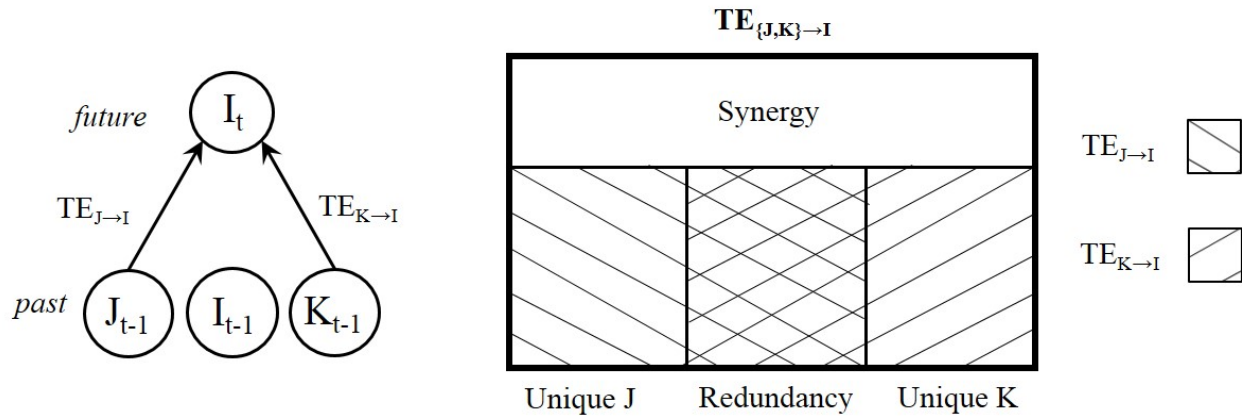

180  
 181 **Figure 4. The Partial Information Decomposition.** In this study, we analyzed two-input computations which were determined using  
 182 the Partial Information Decomposition to dissect multivariate transfer entropy (occurring among three neurons, with two transmitter  
 183 neurons each sending significant information to a receiver neuron) into synergistic, redundant, and unique information terms. The  
 184 synergistic information component was used to represent the amount of computation carried out by the receiver.  
 185

186 Although there are other methods for calculating synergy (Bertschinger et al., 2014; Pica et al.,  
 187 2017), we chose this measure because it is capable of detecting linear and nonlinear interactions  
 188 and it is currently the only measure which can quantify how much synergy occurs in an interaction  
 189 in which three variables (here, receiver past and pasts of the two transmitters) predict a fourth.  
 190 Note, we chose not to consider higher order synergy terms, for systems with more than two  
 191 transmitting neurons, due to the increased computational burden it presented (the number of PID  
 192 terms increases rapidly as the number of variables increases). However, based on bounds  
 193 calculated for the highest order synergy term by Timme et al. (2016), it was determined that the  
 194 information gained by including an additional input beyond two either remained constant or  
 195 decreased. Thus, it was inferred that lower order (two-input) computations dominated.  
 196

197 It is important to re-emphasize two things here. First, transmitter neurons and receiver neurons  
 198 differ in terms of how they are defined. Transmitter neurons are required to have at least one  
 199 outgoing connection (but not necessarily any incoming connections) and receiver neurons are  
 200 required to have at least two incoming connections (but not necessarily any outgoing connections).  
 201 Second, synergy occurs at the receiver neuron (where the two input signals are integrated). Thus,  
 202 transmitters can be thought of as contributing to computation which occurs at the receiver neuron.  
 203

204 **Rich club detection**

205  
 206 To examine the relationship between rich clubs and computation in our networks, we identified  
 207 the weighted rich clubs in each recording. Weighted rich clubs were identified using a modified  
 208 version of the rich\_club\_wd.m function from the Matlab Brain Connectivity toolbox (Rubinov and  
 209 Sporns, 2010; van den Heuvel and Sporns, 2011), adapted according to Opsahl et al. (2008) to  
 210 compute weighted rich clubs. Briefly, this algorithm computes weighted rich-club coefficients as  
 211 follows. For a given recording, a richness parameter ( $r$ ), defined as the sum of the weights  
 212 (incoming and outgoing), was computed for all neurons. Then, for every value of  $r$  observed in a  
 213 recording, a weighted rich club coefficient is computed. A rich club coefficient is computed for  
 214 the  $k^{\text{th}}$  value of  $r$  as follows:  
 215

$$\Phi^w(r_k) = \frac{\sum_{i_{r \geq r_k}} \sum_{j_{r \geq r_k}} TE_{\{i,j\}}}{\sum^n TE^{rank}} \quad (6)$$

216 Here, the numerator is the amount of information transfer between neurons with  $r$  greater than or  
 217 equal to  $r_k$ , computed as the sum of the TE value between these neurons. The denominator is the  
 218 maximum amount of information transfer that could have been observed among the neurons with  
 219  $r$  greater than or equal to  $r_k$ . This is computed as the sum of the largest  $n$  weights in the network  
 220 where  $n$  is the number of edges found between neurons with  $r$  greater than or equal to  $r_k$ . The  
 221 resulting ratio approaches one when the strongest connections connect the neurons that transfer  
 222 the most information (i.e., richest neurons).

223

224 To establish the existence of a significant rich club at a given threshold  $r_k$ , we computed the ratio  
 225 between the observed  $\Phi^w(r_k)$  and the distribution of those observed when the edges of the network  
 226 were shuffled. Shuffles were performed according to the methods of Maslov and Sneppen (2002).  
 227 Briefly, this method randomly selects two edges (e.g.,  $A \rightarrow B$  and  $C \rightarrow D$ ) and randomly swaps either  
 228 the sender or the receivers of the edges ( $A \rightarrow D$  and  $C \rightarrow B$ ). Such rewiring only takes place if the  
 229 newly created edges did not already exist in the network. To shuffle a network, the swapping  
 230 process is repeated four times the number of edges in the network.

231

232 For each network, the rich club coefficients from shuffled versions of the network ( $\Phi_{shuffled}^w$ )  
 233 were computed from 500 shuffled variants of the network. The mean coefficient for each threshold  
 234  $r_k$  across shuffles was then used to normalize the observed coefficients, as follows:

235

$$\Phi_n^w(r_k) = \frac{\Phi_{observed}^w(r_k)}{|\Phi_{shuffled}^w(r_k)|} \quad (7)$$

236 The resulting normalized coefficient,  $\Phi_n^w$ , reflects how many times greater the observed  
 237 coefficients are than the expected values given the distribution of edge weights observed in a given  
 238 network. The significance of a given normalized coefficient was established by computing the  
 239 associated p-value as the number of coefficients from shuffled networks that exceeded the  
 240 observed coefficient and dividing by the number of shuffles (500). We defined p-value  $\leq 0.01$  as  
 241 significant.

242

### 243 **Quantification of the synergy-rich club relationship**

244

245 The relationship between synergy and rich clubs was performed using two approaches. In the first  
 246 approach, we compared the amount of computation inside versus outside of the rich club by  
 247 randomly selecting a single, significant representative rich club for each network and asking what  
 248 the expected synergy-per-triad was for triads with receivers inside versus outside of the rich club.  
 249 Given the risk for sampling bias introduced by the selection of representative rich clubs in the first  
 250 approach, we also pursued a second approach that quantified the relationship between synergy and  
 251 the rich club, at all possible thresholds. That is, for each network, we sorted neurons from strongest  
 252 to weakest, and then cumulatively recruited neurons into the “rich club” one at a time. For this  
 253 second approach, we computed the amount of computation inside and outside of the rich clubs



254 defined at all possible thresholds for each network. The results were then aggregated across  
255 networks by aligning coefficients based on the percentage of the network included in the rich club.  
256 The above approaches were also used to compare the computation ratio, or the ratio of computation  
257 to propagation (summed triad TE), inside versus outside the rich club.  
258  
259

260 In addition to the above analyses which considered the position of the receiver with respect to the  
261 rich club, we also calculated the expected synergy found in all possible interactions of triads with  
262 respect to the rich club for all networks (see Figure 5). This was done to achieve a more detailed  
263 understanding of the relationship between triads, synergy, and rich clubs.

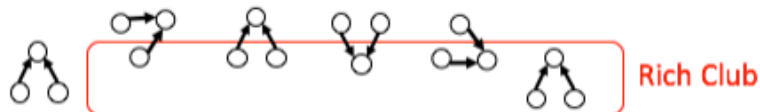

264  
265 **Figure 5.** Schematic of possible configurations of synergistic triads interacting with the rich club. In order to quantify the amount  
266 of computation that takes place within the rich club and to determine how the amount of computation depends on the interaction  
267 between synergistic triads and the rich club, we considered all ways in which synergistic triads could interact with the rich club.  
268 From left to right these include: no triad nodes or edges participate in the rich club, a single transmitter (arrow pointing away) is  
269 in the rich club, both transmitters are in the rich club, only the receiver (both arrows pointing toward) is in the rich club, a  
270 transmitter-edge-receiver combination is in the rich club, and finally, the entire connected triad is in the rich club.  
271  
272

### 273 **Control analyses of the synergy-rich club relationship**

274  
275 Control analysis 1: In order to account for the fact that networks and rich clubs were defined by  
276 TE, a fact which may trivialize the result of greater synergy in rich clubs, we tested the relationship  
277 between synergy and the rich club after permuting the spike times of one transmitter in a triad with  
278 “bonafide” synergy. Here, a triad has bonafide synergy if the total information gained about the  
279 future state of neuron I is greater than the sum of the information provided by neuron J and K in  
280 total (assuming zero redundancy, thus making this maximally conservative) which is expressed as  
281  $TE(\{J, K\} \rightarrow I) > TE(J \rightarrow I) + TE(K \rightarrow I)$ . Spike times were permuted by first identifying all  
282 time bins for which  $R_p$  and  $R_f$  ( $R_p$  = receiver state in the past;  $R_f$  = receiver state in the future) are  
283 in one of the four basic configurations  $\{ [0,0], [0,1], [1,0], [1,1] \}$ . For each configuration, we  
284 shuffled the spike times of the transmitter. By shuffling within configurations of the receiver state  
285 we preserve the transfer entropy from the transmitter to the receiver, but destroy the relationship  
286 between transmitters and therefore leading to a different value of synergy. We repeated this  
287 shuffling procedure 200 times per triad, generating a null distribution of synergy, for all triads with  
288 bonafide synergy in all 75 networks. We then asked whether the null synergy was greater in the  
289 rich club compared to outside. We determined that there is significantly greater median null  
290 synergy in the rich club for the 1.6–6.4 ms timescale 0.0016 ( $Zs.r.= 4.34$ ,  $n = 25$  networks,  $p =$   
291  $1.39 \times 10^{-5}$ ) and the 3.5–14 ms timescale 0.002 ( $Zs.r.= 4.2$ ,  $n = 25$  networks,  $p = 2.54 \times 10^{-5}$ ), but  
292 not for the 0.05–3 ms timescale  $2.5 \times 10^{-5}$  ( $Zs.r. = 0.46$ ,  $n = 25$  networks,  $p = 0.65$ ). We then  
293 compared these differences to those obtained from the observed synergy and found that there is  
294 significantly greater synergy in rich clubs than what would be expected by chance ( $Zs.r. = 5.76$ ,  $n$   
295  $= 75$  networks,  $p = 8.6 \times 10^{-9}$ ). The empirically observed synergy values were significantly greater  
296 in the rich club in 88% (66 out of 75) of the networks. Converting the observed synergy into a z-  
297 score based on the distribution of null synergy values results in a median z-score of 13.31 over all  
298 networks (25.8, 12.03, and 13.5 for timescales 0.05–3 ms, 1.6–6.4 ms and 3.5–14 ms,

299 respectively). The results of this analysis demonstrate that the computation observed in the rich  
300 club is not a simple consequence of the magnitude of the TE values that comprise the rich clubs in  
301 these networks.

302  
303 Control analysis 2: To demonstrate that the result of synergy in the rich club could not have been  
304 explained by simple correlations between incoming weight of the receiver and synergy, we asked  
305 if there is greater synergy in the rich clubs after the correlation between connection strength and  
306 synergy has been regressed out. To do this, we performed a regression between summed incoming  
307 connection strength and synergy across triad receivers for a given network and then collected the  
308 residual synergy for each triad after accounting for the summed incoming connections. We then  
309 asked if the residual synergy values were still significantly greater in the rich club than outside and  
310 found that they were ( $Z_{s.r.} = 6.29$ ,  $n = 75$  networks,  $p = 3.24 \times 10^{-10}$ ).

311  
312 Control analysis 3: To illustrate that outgoing connections are not synonymous with synergy, and  
313 to be sure that potential correlations between the strength of outgoing connection and synergy did  
314 not bias the results reported here, we calculated correlations between summed outgoing connection  
315 strength of the receiver and synergy for all triads in all networks. We found that synergy and  
316 outgoing connection strength are not strongly related. Synergy was slightly negatively correlated  
317 with outgoing connection strength at the longest (3.5–14 ms) timescale ( $\rho = -0.07$ ,  $Z_{s.r.} = -3.54$ ,  $n$   
318  $= 25$  networks,  $p = 0.0004$ ). The sign of the correlation between outgoing weight and synergy was  
319 slightly positive at the shorter timescales ( $\rho = 0.06$ ,  $Z_{s.r.} = 1.98$ ,  $n = 25$  networks,  $p = 0.048$  for the  
320 0.05–3 ms timescale; and,  $\rho = 0.01$ ,  $Z_{s.r.} = 0.2$ ,  $n = 25$  networks,  $p = 0.84$  for the 1.6–6.4 ms  
321 timescale). However, when all networks were considered together, the distribution of correlation  
322 values was centered on zero ( $Z_{s.r.} = -0.8$ ,  $n = 75$  networks,  $p = 0.42$ ). The only of these timescales  
323 which had a strong relationship between weight and synergy was the 3.5–14 ms timescale, but the  
324 relationship was negative, which would work against the pattern of results reported here that  
325 synergy is greatest in rich clubs. In addition to this, we calculated correlations between summed  
326 incoming and outgoing connection strengths of the receivers. Similarly, we did not find evidence  
327 of a clear relationship between these correlations and the result of synergy in the rich. The median  
328 correlation values for timescales 0.05–3 ms, 1.6–6.4 ms and 3.5–14 ms were  $\rho = 0.33$  ( $Z_{s.r.} = 3.7$ ,  
329  $n = 25$  networks,  $p = 0.0002$ ),  $\rho = 0.07$  ( $Z_{s.r.} = 2.25$ ,  $n = 25$  networks,  $p = 0.02$ ), and  $\rho = -0.13$  ( $Z_{s.r.}$   
330  $= -3.13$ ,  $n = 25$  networks,  $p = 0.002$ ), respectively. The fact that the sign and strength of correlations  
331 between summed incoming and outgoing connections strengths across triads did not closely track  
332 difference in synergy density inside versus outside the rich club suggests this was not a  
333 confounding variable.

### 334 335 **Alternative approaches to standard PID**

336  
337 To ensure that our findings were not method-dependent, we performed additional analyses which  
338 implemented alternative methods for calculating synergy. First, we considered the effect of  
339 calculating the lower bound on synergy, which we refer to as “bonafide” synergy. Second, we  
340 considered an approach which, instead of PID, calculates neuron transfer functions according to  
341 the method proposed by Chichilnisky (2001). This method begins with the calculation of each  
342 neuron’s spike-triggered average (STA), which is the average pattern of input spikes preceding a  
343 spike in the cell (i.e. the sum of the inputs  $i$  preceding each spike, divided by the total number of  
344 spikes  $f$ ) for a specific delay  $d$ :

345

$$\text{STA} = \frac{\sum_{t=1}^d i_t f_t}{\sum_{t=1}^d f_t} \quad (8)$$

346

347 Here, we considered a delay of 1-14 ms. In other words, we looked at input patterns occurring  
348 anywhere from 14 to 1 ms before the spike of each neuron. To determine each neuron's response  
349 based on its STA, we next calculated a *generator signal*:  $g_t = a \cdot s_t$ , which is a linear combination  
350 of the input spikes at a particular time, and then examined the average spike count in time bins  
351 with approximately equivalent generator signals (Chichilnisky, 2001). This gave us a neuron  
352 transfer function in the form of probability of spiking vs. generator signal (number of inputs).  
353 Because this relationship can be linear or nonlinear, we then fit each neuron's transfer function  
354 with both a linear and nonlinear (sigmoidal) fit, and calculated the sum of squared errors for each  
355 fit. We then computed the ratio of the sum of squared errors for the sigmoidal fit to sum of squared  
356 error for the linear fit and used a median split to classify neurons as having either linear or nonlinear  
357 transfer functions. Neurons whose sum of squared errors ratio was greater than the median were  
358 classified as linear, whereas those whose sum of squared errors ratio was less than the median were  
359 classified as nonlinear.

360

361 To examine how this approach relates to PID, we compared the expected synergy for neurons with  
362 nonlinear versus linear transfer functions across all networks. To parallel our synergy-rich club  
363 analysis, we also compared the concentration of neurons with nonlinear transfer functions inside  
364 and outside the rich club. That is, we computed the percentage of rich club and non-rich club  
365 neurons that had nonlinear transfer functions.

366

### 367 **Consideration of neuron auto-prediction**

368

369 A further analysis was done to assess the risk posed by the possibility that our use of small windows  
370 when defining the past state of a receiver may underestimate neuron auto-prediction. Such  
371 underestimation could result in inflated TE and synergy values. To address this, we performed an  
372 analysis, similar to Nigam et al., 2016, in which we jittered transmitter neuron spike trains with  
373 respect to receiver neuron spike trains at short timescales, thereby disrupting short timescale  
374 relationships between the neurons but leaving longer timescale statistics intact, and retaining the  
375 auto-prediction of the neuron. We calculated new transfer entropy values as  $TE_{new} =$   
376  $TE_{observed} - TE_{jittered}$ , where  $TE_{jittered}$  was the mean of TE values obtained from 100 different  
377 jitters. When jittering, spike times were shifted randomly within a 3 bin window. Synergy values  
378 were calculated in a corresponding fashion, by jittering both transmitters with respect to the  
379 receiver, and subtracting off the mean of the jittered synergy values. We then repeated the core  
380 analyses of synergy in the rich club with these updated values (results shown in Supplemental  
381 Figure 11).

382

## 383 **SUPPLEMENTAL RESULTS**

384

385 The current study investigated the relationship between synergy and rich clubs at multiple  
386 timescales relevant to synaptic connectivity. Although results have been pooled in the manuscript,  
387 here we show them for each timescale separately. First, we show the existence of rich clubs across

388 networks at each timescale (Figure 6). Second, we show that there is greater synergy in rich clubs  
 389 across networks at each timescale (Figure 7) and that mean network synergy correlates with  
 390 normalized rich club coefficient across networks at each timescale (Figure 8). Third, we show that  
 391 alternative methods to the original PID produce qualitatively similar results of synergy in the rich  
 392 club. Specifically, we use an alternative implementation of PID (Figure 9), as well as a non-  
 393 information theoretic approach to measuring neural computation (Figure 10). Finally, we show the  
 394 results of the bootstrap method which updates TE and synergy values to reflect variance accounted  
 395 for by auto-prediction (Figure 11). The findings of these analyses agree with previous results that  
 396 synergy is elevated in the rich club.  
 397

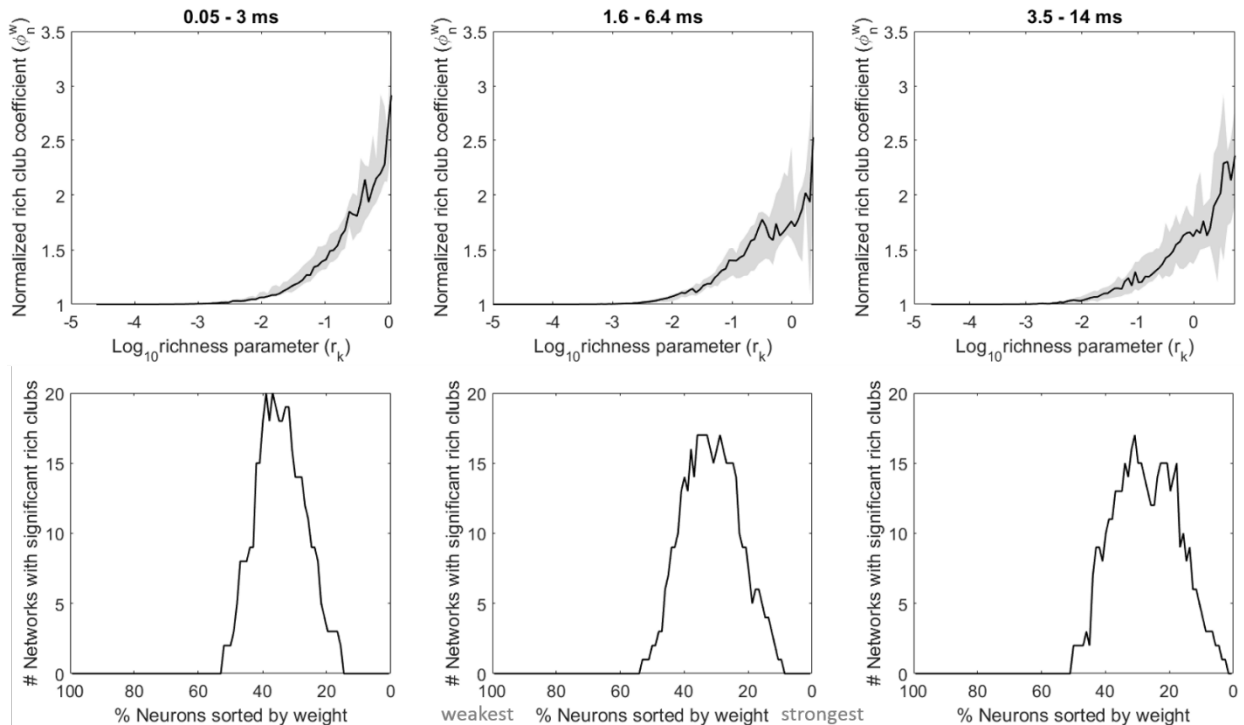

398  
 399  
 400 **Figure 6.** *Network rich clubs.* Aggregate rich club curves for all 25 networks at each timescale. The number of significant rich  
 401 clubs that were found at each of the possible subnetworks (% neurons sorted by weight) across all networks is also shown.  
 402  
 403  
 404

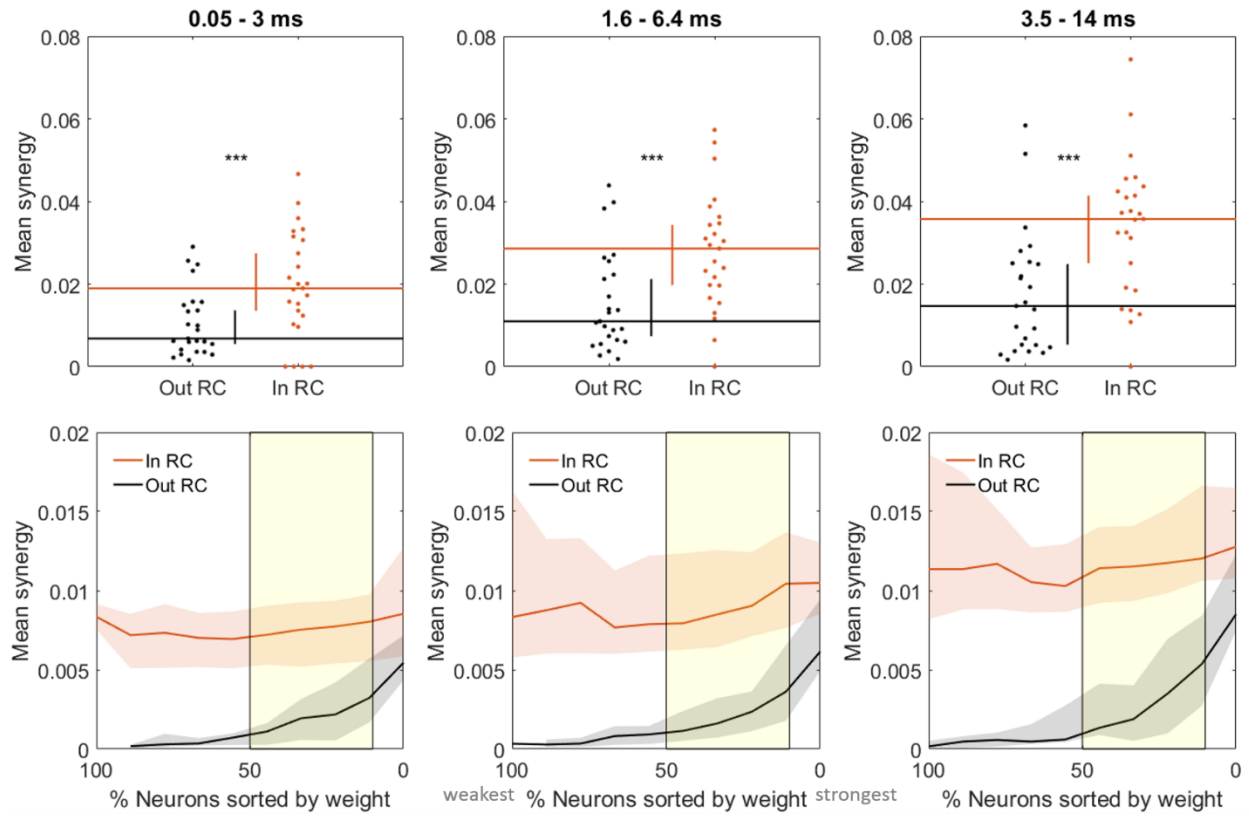

405  
 406  
 407  
 408  
 409  
 410  
 411  
 412

**Figure 7.** Synergy in rich clubs. Synergy is greater in rich clubs at all timescales. This is shown for a significant, representative rich club (top row), as well as at all significant rich club levels (yellow shaded region, bottom row).  $***P < 1 \times 10^{-6}$

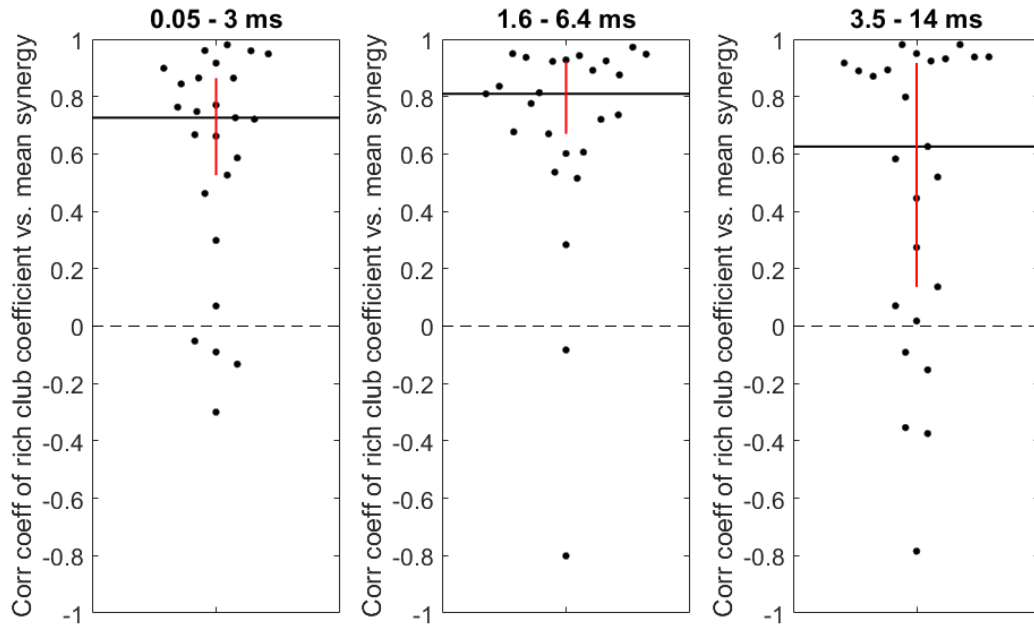

413  
414  
415  
416  
417  
418  
419  
420  
421  
422

**Figure 8.** Mean synergy correlates with normalized rich club coefficient. Correlation values shown for each timescale separately.

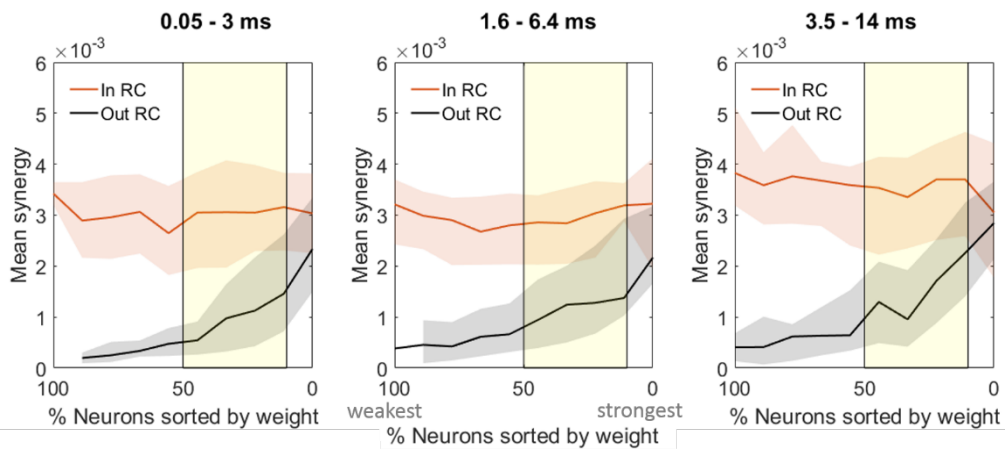

423  
424  
425  
426  
427  
428

**Figure 9.** Results of “bonafide” synergy analyses. Mean “bonafide” synergy is significantly greater in the rich club at all significant rich club levels (yellow shaded region), at all timescales.

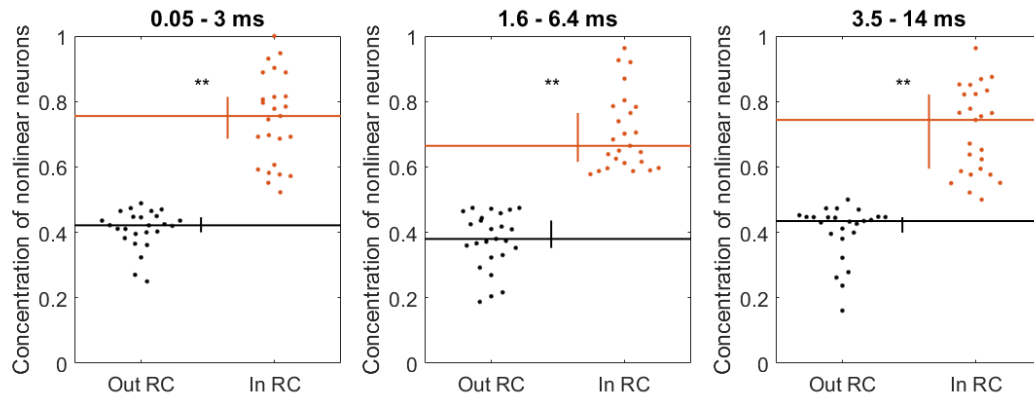

429  
 430  
 431  
 432  
 433  
 434  
 435  
 436

**Figure 10.** *Concentration of nonlinear neurons is highest in the rich club.* The concentration of nonlinear neurons, according to the classification from the Chichilnisky analysis, is significantly larger in the rich club, for all timescales.  $**P < 1 \times 10^{-4}$

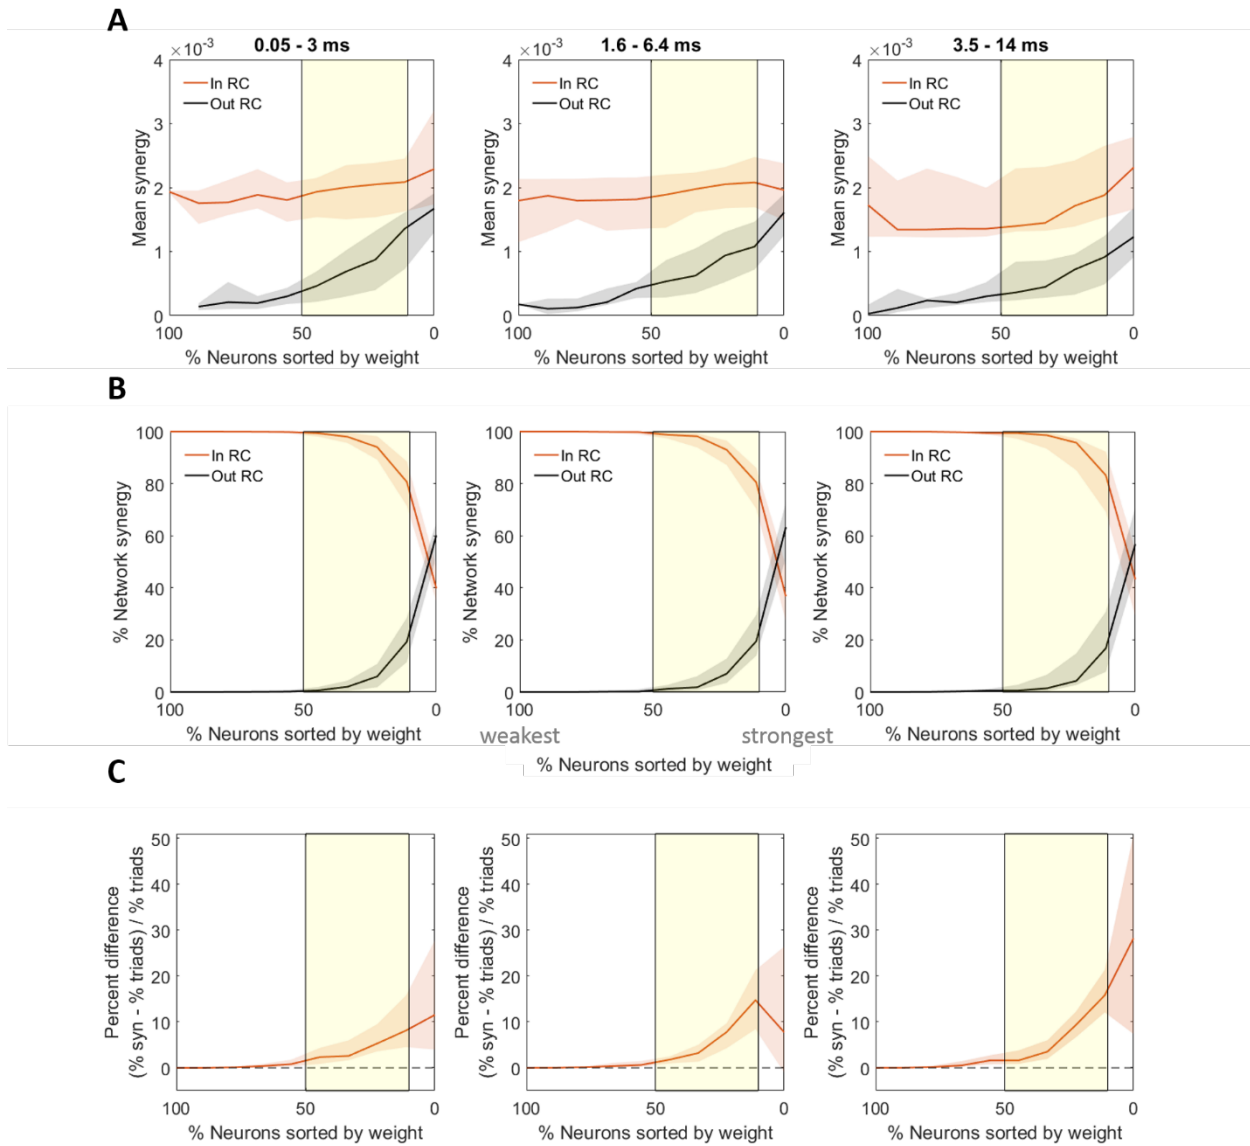

437  
 438  
 439  
 440  
 441  
 442  
 443  
 444  
 445

**Figure 11.** Synergy is highest in the rich club after subtracting TE and synergy values that result from jittered spike trains. (A) Rich club neurons have greater synergy at all significant rich club levels (signrank:  $p = 0.002$ ,  $z = 2.88$ ). (B) The percentage of total network synergy is higher for neurons in the rich club, at significant rich club levels (signrank:  $p = 0.004$ ,  $z = 2.66$ ). (C) The percentage of total network synergy accounted for by rich club neurons is significantly greater than expected given the percentage of triads in the rich club, at all significant rich club levels (signrank:  $p = 0.004$ ,  $z = 2.66$ ). Significant rich club levels indicated by yellow shaded region.
